# Supplementary material
Source: PubMed Central journal article supplement (PMC4425127)
Supplement: NIHMS685441-supplement-Table_A1_Author_Disclosure_Table.pdf [file NIHMS685441-supplement-Table_A1_Author_Disclosure_Table.pdf]

**Table A1** Author disclosure table

| Author                                | Institution                                                                                                    | Consultant/Advisory Board                       | Speakers' Bureau/Honoraria | Research Grant                                                                                      | Fellowship Support | Board Mbs/Stock Options/Partner | Other                                                                                                      |
|---------------------------------------|----------------------------------------------------------------------------------------------------------------|-------------------------------------------------|----------------------------|-----------------------------------------------------------------------------------------------------|--------------------|---------------------------------|------------------------------------------------------------------------------------------------------------|
| David R. Van Wagoner, PhD, FAHA, FHRS | Cleveland Clinic Lerner College of Medicine of Case Western Research University                                | None                                            | None                       | 5: National Institutes of Health                                                                    | None               | None                            | 1: Glaxo Smith Kline Pharmaceuticals                                                                       |
| Jonathan P. Piccini, MD, MHS, FHRS    | Duke University Medical Center, Duke Clinical Research Institute                                               | 1: Spectranetics Corporation, Johnson & Johnson | None                       | 5: Janssen Pharmaceuticals, ARCA Biopharma Inc., Boston Scientific Corp., ResMed, GE Healthcare     | None               | None                            | None                                                                                                       |
| Christine M. Albert, MD, MPH          | Brigham and Women's Hospital; Harvard Medical School                                                           | None                                            | None                       | 5: St. Jude Medical, American Heart Association, National Institutes of Health                      | None               | None                            | None                                                                                                       |
| Mark E. Anderson, MD, PhD, FHRS       | University of Iowa Carver College of Medicine                                                                  | Information currently unavailable               |                            |                                                                                                     |                    |                                 |                                                                                                            |
| Emelia J. Benjamin, MD, ScM           | Boston University Schools of Medicine & Public Health                                                          | Information currently unavailable               |                            |                                                                                                     |                    |                                 |                                                                                                            |
| Bianca Brundel, PhD                   | University Medical Center Groningen                                                                            | Information currently unavailable               |                            |                                                                                                     |                    |                                 |                                                                                                            |
| Robert M. Califf, MD                  | Duke Translational Medicine Institute                                                                          | Information currently unavailable               |                            |                                                                                                     |                    |                                 |                                                                                                            |
| Hugh G. Calkins, MD, FHRS             | Johns Hopkins University School of Medicine                                                                    | 1: AtriCure Inc., Boehringer Ingelheim          | None                       | 3: Medtronic Inc., St. Jude Medical                                                                 | None               | None                            | None                                                                                                       |
| Peng-Sheng Chen, MD, FHRS             | Krannert Institute of Cardiology, Indiana University School of Medicine                                        | None                                            | None                       | None                                                                                                | None               | None                            | 0: Arrhythmotech (private company)<br>3: Equipment donation — Medtronic Inc., Cyberonics, St. Jude Medical |
| Nipavan Chiamvimonvat, MD             | University of California, Davis and the Department of Veterans Affairs, Northern California Health Care System | None                                            | None                       | 1: Veterans Administration<br>5: National Institutes of Health                                      | None               | None                            | None                                                                                                       |
| Dawood Darbar, MD, FHRS               | Vanderbilt University Medical Center                                                                           | None                                            | None                       | 4: Medtronic Inc., St. Jude Medical<br>5: National Institutes of Health, American Heart Association | None               | None                            | None                                                                                                       |
| Lee L. Eckhardt, MD, FHRS             | University of Wisconsin-Madison                                                                                | None                                            | None                       | None                                                                                                | None               | None                            | None                                                                                                       |

**Table A1** (continued)

| Author                           | Institution                                                                 | Consultant/Advisory Board                                                                                                                                                                                                                        | Speakers' Bureau/Honoraria                                                                                                          | Research Grant                                                                                                                                    | Fellowship Support                         | Board Mbs/Stock Options/Partner | Other                                                                                               |
|----------------------------------|-----------------------------------------------------------------------------|--------------------------------------------------------------------------------------------------------------------------------------------------------------------------------------------------------------------------------------------------|-------------------------------------------------------------------------------------------------------------------------------------|---------------------------------------------------------------------------------------------------------------------------------------------------|--------------------------------------------|---------------------------------|-----------------------------------------------------------------------------------------------------|
| Patrick T. Ellinor, MD, PhD      | Massachusetts General Hospital, Broad Institute, and Harvard Medical School | None                                                                                                                                                                                                                                             | None                                                                                                                                | 4: American Heart Association<br>5: National Institutes of Health                                                                                 | None                                       | None                            | None                                                                                                |
| Derek V. Exner, MD, MPH, FHRS    | Libin Cardiovascular Institute of Alberta, University of Calgary            | 1: Medtronic Inc.                                                                                                                                                                                                                                | None                                                                                                                                | 5: St. Jude Medical, Medtronic Inc., GE Healthcare, Heart Force Medical Inc.                                                                      | 5: Medtronic Inc., Boston Scientific Corp. | None                            | 0: Intellectual Property Rights— GE Healthcare, Analytics for Life<br>5: Analytics For Life (Owner) |
| Richard I. Fogel, MD, FHRS, FACC | St. Vincent Medical Group                                                   | None                                                                                                                                                                                                                                             | None                                                                                                                                | None                                                                                                                                              | None                                       | 1: St. Vincent Medical Group    | None                                                                                                |
| Anne M. Gillis MD, FHRS          | Libin Cardiovascular Institute of Alberta, University of Calgary            | 1: Medtronic Inc.                                                                                                                                                                                                                                | None                                                                                                                                | 4: Medtronic Inc.                                                                                                                                 | None                                       | None                            | None                                                                                                |
| Jeff Healey, MD, MSc, FHRS       | Hamilton Health Sciences, McMaster University                               | 1: Boehringer Ingelheim, St. Jude Medical, Bayer HealthCare LLC                                                                                                                                                                                  | None                                                                                                                                | 4: Bristol Myers Squibb<br>5: Boston Scientific Corp., St. Jude Medical, Boehringer Ingelheim, Medtronic Inc., Bristol Meyers Squibb, Pfizer Inc. | None                                       | None                            | None                                                                                                |
| Stefan H. Hohnloser, MD, FHRS    | J.W. Goethe University, Frankfurt, Germany                                  | 1: Boehringer Ingelheim, Bayer HealthCare LLC, Bristol Meyers Squibb, St. Jude Medical, Johnson & Johnson, Gilead Sciences Inc., Servier, Medtronic Inc., Boston Scientific Corp., ZOLL Medical Corp.<br>3: Sanofi Aventis, Boehringer Ingelheim | 1: Sanofi Aventis, Boehringer Ingelheim, Bayer HealthCare LLC, Bristol Meyers Squibb, St. Jude Medical, Medtronic Inc., Pfizer Inc. | None                                                                                                                                              | None                                       | None                            | None                                                                                                |
| Hooman Kamel, MD                 | Weill Cornell Medical College                                               | Information currently unavailable                                                                                                                                                                                                                |                                                                                                                                     |                                                                                                                                                   |                                            |                                 |                                                                                                     |
| David A. Lathrop, PhD            | National Heart, Lung, and Blood Institute, National Institutes of Health    | None                                                                                                                                                                                                                                             | None                                                                                                                                | None                                                                                                                                              | None                                       | None                            | None                                                                                                |
| Gregory Y.H. Lip, MD             | University of Birmingham, United Kingdom, and Aalborg University, Denmark   | Information currently unavailable                                                                                                                                                                                                                |                                                                                                                                     |                                                                                                                                                   |                                            |                                 |                                                                                                     |

Table A1 (continued)

| Author                               | Institution                                                                     | Consultant/Advisory Board                                                                                                                                                                                                                                                                    | Speakers' Bureau/Honoraria | Research Grant                                                                                                                                                                                                                      | Fellowship Support                                                                  | Board Mbs/Stock Options/Partner | Other                                                                                                |
|--------------------------------------|---------------------------------------------------------------------------------|----------------------------------------------------------------------------------------------------------------------------------------------------------------------------------------------------------------------------------------------------------------------------------------------|----------------------------|-------------------------------------------------------------------------------------------------------------------------------------------------------------------------------------------------------------------------------------|-------------------------------------------------------------------------------------|---------------------------------|------------------------------------------------------------------------------------------------------|
| Reena Mehra, MD, MS                  | Cleveland Clinic Lerner College of Medicine of Case Western Research University | Information currently unavailable                                                                                                                                                                                                                                                            |                            |                                                                                                                                                                                                                                     |                                                                                     |                                 |                                                                                                      |
| Sanjiv M. Narayan, MD, PhD, FHRS     | Stanford University                                                             | 1: Medtronic Inc., St. Jude Medical, Biotronik                                                                                                                                                                                                                                               | None                       | 5: National Institutes of Health                                                                                                                                                                                                    | 4: Boston Scientific Corp., St. Jude Medical, Biosense Webster Inc., Medtronic Inc. | None                            | 5: Topera Medical (Equity interests/stock options), Topera Medical (Ownership/partnership/principal) |
| Jeffrey Olgin, MD, FHRS              | University of California San Francisco                                          | None                                                                                                                                                                                                                                                                                         | None                       | 5: ZOLL Medical Corporation                                                                                                                                                                                                         | None                                                                                | None                            | None                                                                                                 |
| Douglas Packer, MD, FHRS             | Mayo Clinic                                                                     | 0: Abiomed, Biosense Webster Inc., Boston Scientific Corp., CardioFocus Corp., Johnson & Johnson, Excerpta Medica, Ortho-McNeil-Janssen, Sanofi Aventis, St. Jude Medical, CardioInsight Technologies, InfoBionic, SIEMENS, Medtronic Inc., CardioDx Inc., FoxP2 Medica, Mediasphere Medical | None                       | 0: Endosense, Thermedical1: CardioFocus Inc., Hansen Medical, SIEMENS<br>2: American Heart Association, EpiEP<br>5: Biosense Webster Inc., National Institutes of Health, St. Jude Medical, Medtronic Inc., Boston Scientific Corp. | None                                                                                | None                            | 1: Wiley-Blackwell<br>5: St. Jude Medical                                                            |
| Nicholas S. Peters, MD, FHRS         | Imperial College & Imperial NHS Trust, London                                   | 1: Magnetecs, Medtronic Inc., Sanofi Aventis, Estech                                                                                                                                                                                                                                         | 1: Sanofi Aventis          | 1: CardioInsight Technologies                                                                                                                                                                                                       | None                                                                                | None                            | None                                                                                                 |
| Dan M. Roden, MD, FHRS               | Vanderbilt University School of Medicine                                        | None                                                                                                                                                                                                                                                                                         | None                       | 5: National Institutes of Health                                                                                                                                                                                                    | None                                                                                | None                            | 1: Clinical Data (Royalty income)                                                                    |
| Heather M. Ross, DNP, ANP-BC, FHRS   | Arizona State University                                                        | None                                                                                                                                                                                                                                                                                         | None                       | None                                                                                                                                                                                                                                | None                                                                                | None                            | 0: Preventice (Equity interests)                                                                     |
| Robert Sheldon, MD, PhD, FHRS, FRCPC | Libin Cardiovascular Institute of Alberta, University of Calgary                | None                                                                                                                                                                                                                                                                                         | None                       | None                                                                                                                                                                                                                                | None                                                                                | None                            | None                                                                                                 |
| Xander H.T. Wehrens, MD, PhD, FHRS   | Baylor College of Medicine                                                      | None                                                                                                                                                                                                                                                                                         | None                       | 4: American Heart Association<br>5: National Institutes of Health                                                                                                                                                                   | None                                                                                | None                            | 1: Elex Biotech (Equity interests/stock options)                                                     |

0 = \$0; 1 = <\$10,000; 2 = >\$10,001 to <\$25,000; 3 = >\$25,001 to <\$50,000; 4 = >\$50,001 to <\$100,000; 5 = >\$100,001
